# Supplementary material for: Transgenic overexpression of the miR-200b/200a/429 cluster inhibits mammary tumor initiation
Source: PubMed Central journal article supplement — Transl Oncol. 2021 Sep 22;14(12):101228. doi: 10.1016/j.tranon.2021.101228 (PMC8473771; doi:10.1016/j.tranon.2021.101228), 2021-09-22
Supplement: mmc2.pdf [file mmc2.pdf]

Transcripts Differentially Expressed in MTB-200ba429 Mammary Glands Compared to Control Mammary Glands

| <b>ID</b>          | <b>Gene Symbol</b> | <b>LogFC</b> | <b>FDR</b> |
|--------------------|--------------------|--------------|------------|
| ENSMUSG00000065549 | mir200b            | 10.1         | 1.50E-07   |
| ENSMUSG00000024526 | Cidea              | 2.2          | 1.10E-03   |
| ENSMUSG00000027996 | Sfrp2              | -1.2         | 1.60E-03   |
| ENSMUSG00000058022 | Adtrp              | 1.2          | 2.90E-03   |
| ENSMUSG00000000402 | Egfl6              | 1.9          | 3.10E-03   |
| ENSMUSG00000031725 | Ces1f              | 1.3          | 4.30E-03   |
| ENSMUSG00000063297 | Luzp2              | 1.9          | 4.30E-03   |
| ENSMUSG00000025488 | Cox8b              | 1.6          | 9.80E-03   |
| ENSMUSG00000051243 | Islr2              | -1.3         | 9.80E-03   |

Glands

Transcripts Differentially Expressed in MTB-IGFIR Mammary Glands Compared to Control Mammary Glands

| <b>ID</b>           | <b>Gene Symbol</b> | <b>LogFC</b> | <b>FDR</b> |
|---------------------|--------------------|--------------|------------|
| ENSMUSG00000055561  | Spink5             | 3.9          | 6.15E-17   |
| ENSMUSG00000021553  | Slc28a3            | 1.7          | 2.38E-16   |
| ENSMUSG00000005533  | Igf1r              | 3.2          | 1.33E-15   |
| ENSMUSG00000021803  | Cdhr1              | 3.0          | 4.25E-15   |
| ENSMUSG00000004885  | Crabp2             | 2.4          | 8.12E-15   |
| ENSMUSG00000022991  | Lalba              | 2.8          | 1.04E-14   |
| ENSMUSG00000028262  | Ctca3a2            | 3.3          | 2.52E-14   |
| ENSMUSG00000074892  | B3galt5            | 4.6          | 2.37E-13   |
| ENSMUSG000000057465 | Saa2               | 3.9          | 9.19E-13   |
| ENSMUSG00000001622  | Csn3               | 3.2          | 1.07E-12   |
| ENSMUSG00000074115  | Saa1               | 3.6          | 1.41E-11   |
| ENSMUSG00000096001  | 2610528A11Rik      | 2.2          | 1.67E-10   |
| ENSMUSG00000073600  | Prob1              | 1.9          | 2.93E-10   |
| ENSMUSG00000032068  | Plet1              | 2.4          | 4.36E-10   |
| ENSMUSG00000000983  | Wfdc18             | 2.6          | 2.37E-09   |
| ENSMUSG00000022512  | Cldn1              | 1.9          | 2.92E-09   |
| ENSMUSG00000027562  | Car2               | 2.0          | 5.07E-09   |
| ENSMUSG00000026417  | Pigr               | 2.9          | 5.07E-09   |
| ENSMUSG00000042268  | Slc26a9            | 3.1          | 9.41E-09   |
| ENSMUSG00000063297  | Luzp2              | 3.9          | 1.12E-08   |
| ENSMUSG00000026822  | Lcn2               | 2.6          | 4.12E-08   |
| ENSMUSG00000010064  | Slc38a3            | 3.4          | 6.81E-08   |
| ENSMUSG00000105954  | Gm42793            | 4.6          | 2.07E-07   |
| ENSMUSG00000032091  | Tmprss4            | 2.2          | 2.41E-07   |
| ENSMUSG00000047230  | Cldn2              | 3.5          | 3.48E-07   |
| ENSMUSG00000033187  | BC016579           | 3.4          | 5.70E-07   |
| ENSMUSG00000102187  | Gm7897             | 20.7         | 6.18E-07   |
| ENSMUSG00000027832  | Ptx3               | 2.0          | 6.61E-07   |
| ENSMUSG00000007908  | Hmgcl1             | 2.6          | 7.06E-07   |
| ENSMUSG00000033508  | Asprv1             | 2.7          | 7.06E-07   |
| ENSMUSG00000013483  | Card14             | 2.0          | 7.46E-07   |
| ENSMUSG00000043430  | Psap1              | 3.5          | 8.09E-07   |
| ENSMUSG000000055976 | Cldn23             | 1.8          | 8.29E-07   |
| ENSMUSG00000018648  | Dusp14             | 1.4          | 9.51E-07   |
| ENSMUSG00000009092  | Derl3              | 2.5          | 1.20E-06   |
| ENSMUSG00000020159  | Gabrp              | 2.5          | 1.32E-06   |
| ENSMUSG00000010601  | Apol7a             | 2.5          | 1.32E-06   |
| ENSMUSG00000038670  | Mybpc2             | 2.6          | 1.32E-06   |
| ENSMUSG00000023011  | Faim2              | 2.3          | 1.51E-06   |
| ENSMUSG000000059824 | Dbp                | -1.2         | 1.68E-06   |
| ENSMUSG00000031610  | Scrg1              | 6.3          | 1.97E-06   |
| ENSMUSG00000021187  | Tc2n               | 2.9          | 2.43E-06   |
| ENSMUSG00000029154  | Cwh43              | 4.7          | 2.91E-06   |
| ENSMUSG00000036225  | Kctd1              | 1.4          | 3.27E-06   |
| ENSMUSG00000040187  | Arntl2             | 1.4          | 3.27E-06   |

|                    |               |      |          |
|--------------------|---------------|------|----------|
| ENSMUSG00000114828 | AI463229      | 2.1  | 6.45E-06 |
| ENSMUSG00000055373 | Fut9          | 2.1  | 7.36E-06 |
| ENSMUSG00000047281 | Sfn           | 1.3  | 1.05E-05 |
| ENSMUSG00000026147 | Col9a1        | 2.7  | 1.14E-05 |
| ENSMUSG00000035638 | Muc20         | 2.3  | 1.49E-05 |
| ENSMUSG00000024376 | Epb41l4a      | 1.5  | 2.17E-05 |
| ENSMUSG00000068740 | Celsr2        | 1.8  | 2.39E-05 |
| ENSMUSG00000054036 | Olfr279       | 4.7  | 2.39E-05 |
| ENSMUSG00000015519 | 2310057J18Rik | 5.5  | 2.46E-05 |
| ENSMUSG00000026450 | Chit1         | 7.0  | 2.46E-05 |
| ENSMUSG00000006764 | Tph2          | -3.1 | 2.59E-05 |
| ENSMUSG00000029602 | Rasal1        | 2.3  | 2.81E-05 |
| ENSMUSG00000000308 | Ckmt1         | 1.6  | 3.28E-05 |
| ENSMUSG00000108106 | Gm5886        | 5.5  | 3.69E-05 |
| ENSMUSG00000040413 | Timd2         | 1.6  | 4.26E-05 |
| ENSMUSG00000029188 | Slc34a2       | 1.8  | 4.26E-05 |
| ENSMUSG00000034912 | Mdga2         | 2.2  | 4.26E-05 |
| ENSMUSG00000055116 | Arntl         | 1.4  | 4.44E-05 |
| ENSMUSG00000020902 | Ntn1          | 1.5  | 5.12E-05 |
| ENSMUSG00000078612 | Fyb2          | 1.8  | 5.20E-05 |
| ENSMUSG00000039323 | Igfbp2        | 1.4  | 5.30E-05 |
| ENSMUSG00000028838 | Extl1         | 2.2  | 6.54E-05 |
| ENSMUSG00000027333 | Smox          | 1.4  | 7.46E-05 |
| ENSMUSG00000042766 | Trim46        | 1.2  | 7.67E-05 |
| ENSMUSG00000003849 | Nqo1          | 2.0  | 8.06E-05 |
| ENSMUSG00000034127 | Tspan8        | 2.5  | 8.06E-05 |
| ENSMUSG00000027186 | Elf5          | 1.2  | 8.20E-05 |
| ENSMUSG00000070794 | BC016548      | 1.8  | 8.20E-05 |
| ENSMUSG00000070777 | Ceacam20      | 1.9  | 8.20E-05 |
| ENSMUSG00000052271 | Bhlha15       | 2.7  | 8.20E-05 |
| ENSMUSG00000037946 | Fgd3          | 1.2  | 8.65E-05 |
| ENSMUSG00000056025 | Clca3a1       | 1.8  | 9.62E-05 |
| ENSMUSG00000028172 | Tacr3         | 3.4  | 1.00E-04 |
| ENSMUSG00000028351 | Brinp1        | 2.5  | 1.17E-04 |
| ENSMUSG00000051727 | Kctd14        | 1.6  | 1.24E-04 |
| ENSMUSG00000031089 | Slc6a14       | 3.0  | 1.31E-04 |
| ENSMUSG00000027570 | Col9a3        | 1.7  | 1.37E-04 |
| ENSMUSG00000051439 | Cd14          | 1.1  | 1.45E-04 |
| ENSMUSG00000026158 | Ogfrl1        | 1.8  | 1.45E-04 |
| ENSMUSG00000054342 | Kcnn4         | 1.8  | 1.50E-04 |
| ENSMUSG00000074852 | Hpse2         | 3.7  | 1.52E-04 |
| ENSMUSG00000017390 | Aldoc         | 2.1  | 1.58E-04 |
| ENSMUSG00000025165 | Sectm1a       | 1.5  | 1.70E-04 |
| ENSMUSG00000029375 | Cxcl15        | -2.0 | 1.75E-04 |
| ENSMUSG00000116056 | Gm4544        | 2.0  | 1.75E-04 |
| ENSMUSG00000042401 | Crtac1        | -1.7 | 1.80E-04 |
| ENSMUSG00000052854 | Nrk           | 1.8  | 1.96E-04 |

|                    |               |      |          |
|--------------------|---------------|------|----------|
| ENSMUSG00000115654 | Gm19303       | 6.3  | 1.96E-04 |
| ENSMUSG00000028626 | Col9a2        | 1.9  | 2.00E-04 |
| ENSMUSG00000100429 | Gm29186       | 4.1  | 2.14E-04 |
| ENSMUSG00000018569 | Cldn7         | 1.2  | 2.27E-04 |
| ENSMUSG00000048022 | Tmem229a      | 1.7  | 2.49E-04 |
| ENSMUSG00000012123 | Crybg2        | 2.1  | 2.70E-04 |
| ENSMUSG00000021798 | Ldb3          | 1.3  | 2.84E-04 |
| ENSMUSG00000026051 | Ecrq4         | 1.8  | 2.84E-04 |
| ENSMUSG00000064246 | Chil1         | 3.7  | 2.86E-04 |
| ENSMUSG00000029304 | Spp1          | 2.8  | 3.31E-04 |
| ENSMUSG00000074272 | Ceacam1       | 1.3  | 4.12E-04 |
| ENSMUSG00000002459 | Rgs20         | 1.4  | 4.45E-04 |
| ENSMUSG00000049939 | Lrrc4         | 1.6  | 4.54E-04 |
| ENSMUSG00000028972 | Car6          | 1.8  | 4.81E-04 |
| ENSMUSG00000011034 | Slc5a1        | 1.4  | 4.87E-04 |
| ENSMUSG00000076434 | Wfdc3         | 1.8  | 5.07E-04 |
| ENSMUSG00000030077 | Chl1          | 3.7  | 5.07E-04 |
| ENSMUSG00000033965 | Slc16a2       | 1.2  | 5.53E-04 |
| ENSMUSG00000095493 | A630023A22Rik | 1.8  | 5.53E-04 |
| ENSMUSG00000050063 | Klk6          | 8.6  | 5.53E-04 |
| ENSMUSG00000059974 | Ntm           | -1.3 | 5.84E-04 |
| ENSMUSG00000003617 | Cp            | 1.4  | 5.93E-04 |
| ENSMUSG00000038094 | Atp13a4       | 1.6  | 6.13E-04 |
| ENSMUSG00000042784 | Muc1          | 1.3  | 6.18E-04 |
| ENSMUSG00000033634 | Nat8f2        | 1.6  | 6.34E-04 |
| ENSMUSG00000017453 | Pipox         | 3.1  | 6.34E-04 |
| ENSMUSG00000063296 | Tmem117       | 1.9  | 6.47E-04 |
| ENSMUSG00000028544 | Slc5a9        | 1.9  | 6.76E-04 |
| ENSMUSG00000079620 | Muc4          | 2.2  | 6.87E-04 |
| ENSMUSG00000033256 | Shf           | 1.7  | 6.93E-04 |
| ENSMUSG00000109973 | Gm45397       | 5.1  | 7.01E-04 |
| ENSMUSG00000060969 | Irx1          | 1.3  | 7.03E-04 |
| ENSMUSG00000021087 | Rtn1          | 1.5  | 7.13E-04 |
| ENSMUSG00000028836 | Slc30a2       | 2.4  | 7.44E-04 |
| ENSMUSG00000067006 | Serpinb5      | 1.7  | 7.74E-04 |
| ENSMUSG00000001131 | Timp1         | -1.3 | 7.93E-04 |
| ENSMUSG00000032845 | Alpk2         | -2.3 | 8.01E-04 |
| ENSMUSG00000030650 | Tmc5          | 1.3  | 9.12E-04 |
| ENSMUSG00000063975 | Slco1a5       | 2.0  | 9.12E-04 |
| ENSMUSG00000033006 | Sox10         | 1.6  | 9.54E-04 |
| ENSMUSG00000030701 | Plekhb1       | 1.1  | 9.88E-04 |
| ENSMUSG00000031274 | Col4a5        | 1.7  | 9.88E-04 |
| ENSMUSG00000025813 | Homer2        | 1.8  | 9.88E-04 |
| ENSMUSG00000026185 | Igfbp5        | 1.8  | 9.88E-04 |
| ENSMUSG00000070419 | Cyp3a57       | -2.6 | 1.08E-03 |
| ENSMUSG00000049551 | Fzd9          | 2.4  | 1.15E-03 |
| ENSMUSG00000086843 | E030013119Rik | 2.0  | 1.16E-03 |

|                    |               |      |          |
|--------------------|---------------|------|----------|
| ENSMUSG00000091956 | C2cd4b        | 4.5  | 1.17E-03 |
| ENSMUSG00000035105 | Egln3         | 1.9  | 1.21E-03 |
| ENSMUSG00000024774 | Ankrd22       | 5.2  | 1.21E-03 |
| ENSMUSG00000053279 | Aldh1a1       | -1.3 | 1.29E-03 |
| ENSMUSG00000018893 | Mb            | 1.2  | 1.29E-03 |
| ENSMUSG00000041540 | Sox5          | 1.2  | 1.29E-03 |
| ENSMUSG00000086596 | Susd5         | 2.9  | 1.29E-03 |
| ENSMUSG00000046182 | Gsg1l         | 1.4  | 1.29E-03 |
| ENSMUSG00000044737 | Klk14         | 2.9  | 1.37E-03 |
| ENSMUSG00000053063 | Clec12a       | -1.2 | 1.40E-03 |
| ENSMUSG00000034488 | Edil3         | 1.9  | 1.40E-03 |
| ENSMUSG00000049723 | Mmp12         | -1.2 | 1.42E-03 |
| ENSMUSG00000034164 | Emid1         | 1.6  | 1.42E-03 |
| ENSMUSG00000114104 | Gm47585       | 3.5  | 1.44E-03 |
| ENSMUSG00000019787 | Trdn          | -2.7 | 1.45E-03 |
| ENSMUSG00000012350 | Ehf           | 1.5  | 1.45E-03 |
| ENSMUSG00000026994 | Galnt3        | 1.9  | 1.45E-03 |
| ENSMUSG00000052151 | Plpp2         | 1.1  | 1.50E-03 |
| ENSMUSG00000050295 | Foxc1         | 1.2  | 1.51E-03 |
| ENSMUSG00000078954 | Arhgap8       | 1.3  | 1.51E-03 |
| ENSMUSG00000019866 | Crybg1        | 1.4  | 1.54E-03 |
| ENSMUSG00000117123 | Gm49890       | 2.1  | 1.59E-03 |
| ENSMUSG00000045319 | Proser2       | 1.3  | 1.59E-03 |
| ENSMUSG00000026768 | Itga8         | 1.7  | 1.59E-03 |
| ENSMUSG00000022479 | Vdr           | 1.6  | 1.62E-03 |
| ENSMUSG00000022176 | Rem2          | 1.6  | 1.71E-03 |
| ENSMUSG00000075555 | Gm10863       | 2.1  | 1.72E-03 |
| ENSMUSG00000054871 | Tmem158       | -1.1 | 1.72E-03 |
| ENSMUSG00000000296 | Tpd52l1       | 2.0  | 1.72E-03 |
| ENSMUSG00000022025 | Cnmd          | 2.2  | 1.77E-03 |
| ENSMUSG00000005107 | Slc2a9        | 1.4  | 1.80E-03 |
| ENSMUSG00000060962 | Dmkn          | 1.8  | 1.98E-03 |
| ENSMUSG00000028755 | Cda           | 1.3  | 1.99E-03 |
| ENSMUSG00000086804 | Gm43154       | 2.0  | 2.01E-03 |
| ENSMUSG00000030017 | Reg3g         | 3.0  | 2.03E-03 |
| ENSMUSG00000106957 | Gm43085       | -2.1 | 2.03E-03 |
| ENSMUSG00000020644 | Id2           | 1.3  | 2.06E-03 |
| ENSMUSG00000031444 | F10           | -2.2 | 2.06E-03 |
| ENSMUSG00000001827 | Folr1         | 1.7  | 2.09E-03 |
| ENSMUSG00000054598 | 9130230L23Rik | 1.8  | 2.14E-03 |
| ENSMUSG00000016526 | Dyrk3         | 1.4  | 2.18E-03 |
| ENSMUSG00000029503 | P2rx2         | 2.1  | 2.20E-03 |
| ENSMUSG00000050473 | Slc35d3       | 2.2  | 2.21E-03 |
| ENSMUSG00000034112 | Atp2c2        | 1.1  | 2.22E-03 |
| ENSMUSG00000048706 | Lurap1l       | 1.2  | 2.26E-03 |
| ENSMUSG00000027656 | Ccn5          | -1.1 | 2.31E-03 |
| ENSMUSG00000026976 | Pax8          | 3.4  | 2.31E-03 |

|                    |               |      |          |
|--------------------|---------------|------|----------|
| ENSMUSG00000040447 | Spns2         | 1.1  | 2.37E-03 |
| ENSMUSG00000030510 | Cers3         | 1.6  | 2.39E-03 |
| ENSMUSG00000029716 | Tfr2          | -1.4 | 2.41E-03 |
| ENSMUSG00000047222 | Rnase2a       | -2.7 | 2.42E-03 |
| ENSMUSG00000006269 | Atp6v1b1      | 1.5  | 2.44E-03 |
| ENSMUSG00000020062 | Slc5a8        | 1.8  | 2.47E-03 |
| ENSMUSG00000058743 | Kcnj14        | -1.3 | 2.49E-03 |
| ENSMUSG00000040412 | 5330417C22Rik | 3.1  | 2.49E-03 |
| ENSMUSG00000028392 | Bspry         | 1.2  | 2.60E-03 |
| ENSMUSG00000006179 | Prss16        | 1.5  | 2.64E-03 |
| ENSMUSG00000060131 | Atp8b4        | -1.3 | 2.65E-03 |
| ENSMUSG00000017969 | Ptgis         | -1.1 | 2.65E-03 |
| ENSMUSG00000039835 | Nhsl1         | 2.0  | 2.71E-03 |
| ENSMUSG00000073460 | Pnlcd1        | -1.2 | 2.76E-03 |
| ENSMUSG00000041782 | Lad1          | 1.2  | 2.79E-03 |
| ENSMUSG00000029307 | Dmp1          | 2.2  | 2.89E-03 |
| ENSMUSG00000027966 | Col11a1       | 3.5  | 2.89E-03 |
| ENSMUSG00000032487 | Ptgs2         | 1.8  | 2.94E-03 |
| ENSMUSG00000036960 | Clca2         | 1.9  | 2.94E-03 |
| ENSMUSG00000107388 | Gm42788       | 2.0  | 2.97E-03 |
| ENSMUSG00000028919 | Arhgef19      | 1.5  | 3.01E-03 |
| ENSMUSG00000030994 | D7Ert443e     | 1.4  | 3.09E-03 |
| ENSMUSG00000007107 | Atp1a4        | -1.8 | 3.11E-03 |
| ENSMUSG00000020205 | Phlda1        | 1.1  | 3.21E-03 |
| ENSMUSG00000033268 | Duox1         | 2.0  | 3.23E-03 |
| ENSMUSG00000028640 | Tfap2c        | 1.3  | 3.24E-03 |
| ENSMUSG00000118163 | Gm41757       | -3.6 | 3.29E-03 |
| ENSMUSG00000023267 | Gabrr2        | -2.2 | 3.33E-03 |
| ENSMUSG00000061322 | Dnaic1        | -1.4 | 3.43E-03 |
| ENSMUSG00000021636 | Marveld2      | 1.3  | 3.49E-03 |
| ENSMUSG00000031273 | Col4a6        | 1.5  | 3.49E-03 |
| ENSMUSG00000037681 | Esyt3         | 1.9  | 3.49E-03 |
| ENSMUSG00000022780 | Melf          | 2.0  | 3.49E-03 |
| ENSMUSG00000031438 | Rnf128        | 1.1  | 3.53E-03 |
| ENSMUSG00000051379 | Flrt3         | 1.2  | 3.57E-03 |
| ENSMUSG00000050808 | Muc15         | 1.9  | 3.57E-03 |
| ENSMUSG00000021678 | F2rl1         | 1.1  | 3.62E-03 |
| ENSMUSG00000030935 | Acsm3         | 1.4  | 3.67E-03 |
| ENSMUSG00000032501 | Trib1         | 1.1  | 3.74E-03 |
| ENSMUSG00000085282 | Gm15663       | 1.6  | 3.77E-03 |
| ENSMUSG00000030108 | Slc6a13       | -1.1 | 3.83E-03 |
| ENSMUSG00000104213 | Ighd          | -1.8 | 3.83E-03 |
| ENSMUSG00000051076 | Vttn1         | 1.2  | 3.83E-03 |
| ENSMUSG00000072618 | Gm10384       | 1.8  | 3.83E-03 |
| ENSMUSG00000038550 | Ciart         | -1.5 | 3.83E-03 |
| ENSMUSG00000111774 | Gm38398       | -1.4 | 3.95E-03 |
| ENSMUSG00000054204 | Alkal2        | 3.7  | 3.97E-03 |

|                    |               |      |          |
|--------------------|---------------|------|----------|
| ENSMUSG00000027270 | Lamp5         | -3.1 | 4.11E-03 |
| ENSMUSG00000044976 | Wdr72         | 2.0  | 4.11E-03 |
| ENSMUSG00000032092 | Mpzl2         | 1.0  | 4.17E-03 |
| ENSMUSG00000006219 | Fblim1        | 1.6  | 4.18E-03 |
| ENSMUSG00000030111 | A2m           | 6.7  | 4.32E-03 |
| ENSMUSG00000044641 | Pard6b        | 1.1  | 4.33E-03 |
| ENSMUSG00000099413 | Gm17767       | 3.4  | 4.37E-03 |
| ENSMUSG00000037370 | Enpp1         | 1.6  | 4.50E-03 |
| ENSMUSG00000046637 | Ttc34         | -2.1 | 4.51E-03 |
| ENSMUSG00000022105 | Rb1           | 1.3  | 4.74E-03 |
| ENSMUSG00000114357 | Gm48449       | 1.7  | 4.77E-03 |
| ENSMUSG00000086321 | Gm11413       | 5.8  | 4.83E-03 |
| ENSMUSG00000058354 | Krt6a         | 4.4  | 4.94E-03 |
| ENSMUSG00000022900 | Ildr1         | 1.4  | 5.01E-03 |
| ENSMUSG00000056031 | 9330154J02Rik | -1.1 | 5.08E-03 |
| ENSMUSG00000027224 | Duoxa1        | 1.7  | 5.08E-03 |
| ENSMUSG00000034813 | Grip1         | 1.5  | 5.19E-03 |
| ENSMUSG00000027536 | Chmp4c        | 1.5  | 5.30E-03 |
| ENSMUSG00000032496 | Ltf           | 2.7  | 5.30E-03 |
| ENSMUSG00000043592 | Unc5cl        | 1.6  | 5.33E-03 |
| ENSMUSG00000072945 | Ripply1       | 3.5  | 5.52E-03 |
| ENSMUSG00000018849 | Wwc1          | 1.4  | 5.85E-03 |
| ENSMUSG00000021198 | Unc79         | -1.4 | 6.13E-03 |
| ENSMUSG00000017897 | Eya2          | 1.2  | 6.13E-03 |
| ENSMUSG00000025105 | Bnc1          | 1.8  | 6.13E-03 |
| ENSMUSG00000021359 | Tfap2a        | 1.0  | 6.34E-03 |
| ENSMUSG00000114439 | Gm48395       | 5.1  | 6.34E-03 |
| ENSMUSG00000072723 | Gm10044       | 1.8  | 6.45E-03 |
| ENSMUSG00000032666 | 1700025G04Rik | 1.2  | 6.50E-03 |
| ENSMUSG00000039084 | Chad          | 5.1  | 6.53E-03 |
| ENSMUSG00000003585 | Sec14l2       | 1.4  | 6.76E-03 |
| ENSMUSG00000026435 | Slc45a3       | 1.2  | 7.05E-03 |
| ENSMUSG00000071506 | Tmem139       | 1.3  | 7.05E-03 |
| ENSMUSG00000031608 | Galnt7        | 1.1  | 7.09E-03 |
| ENSMUSG00000054196 | Cthrc1        | -1.1 | 7.18E-03 |
| ENSMUSG00000030494 | Rhpn2         | 1.1  | 7.34E-03 |
| ENSMUSG00000032373 | Car12         | 3.5  | 7.67E-03 |
| ENSMUSG00000037188 | Grhl3         | 2.4  | 7.72E-03 |
| ENSMUSG00000031849 | Comp          | 2.9  | 7.99E-03 |
| ENSMUSG00000060621 | Nkpd1         | 2.7  | 8.05E-03 |
| ENSMUSG00000031292 | Cdkl5         | 1.7  | 8.06E-03 |
| ENSMUSG00000030708 | Dnajb13       | -1.3 | 8.36E-03 |
| ENSMUSG00000021751 | Acox2         | 2.1  | 8.36E-03 |
| ENSMUSG00000016262 | Sertad4       | 1.3  | 8.47E-03 |
| ENSMUSG00000032718 | Mansc1        | 1.3  | 8.60E-03 |
| ENSMUSG00000022149 | C9            | 1.7  | 8.69E-03 |
| ENSMUSG00000050334 | C130071C03Rik | 4.8  | 8.69E-03 |



|                    |         |      |          |
|--------------------|---------|------|----------|
| ENSMUSG00000098836 | Gm27572 | 2.2  | 8.73E-03 |
| ENSMUSG00000041660 | Bbox1   | 1.5  | 9.04E-03 |
| ENSMUSG00000049154 | Fam183b | -1.6 | 9.12E-03 |
| ENSMUSG00000072568 | Lratd2  | 1.2  | 9.27E-03 |
| ENSMUSG00000042182 | Bend6   | 1.4  | 9.27E-03 |
| ENSMUSG00000024347 | Psd2    | 1.0  | 9.68E-03 |
| ENSMUSG00000029695 | Aass    | 1.6  | 9.77E-03 |
| ENSMUSG00000056078 | Lipm    | 4.1  | 9.77E-03 |
| ENSMUSG00000050315 | Synpo2  | -1.3 | 9.94E-03 |
| ENSMUSG00000029282 | Amtn    | 3.7  | 9.94E-03 |

Transcripts Differentially Expressed in MTB-IGFIR Mammary Glands Compared to MTB-IGFIRba429 Mamr

| <b>ID</b>          | <b>Gene Symbol</b> | <b>LogFC</b> | <b>FDR</b> |
|--------------------|--------------------|--------------|------------|
| ENSMUSG00000057465 | Saa2               | 3.2          | 1.15E-21   |
| ENSMUSG00000022887 | Masp1              | -2.4         | 1.02E-10   |
| ENSMUSG00000074115 | Saa1               | 2.7          | 4.57E-10   |
| ENSMUSG00000000120 | Ngfr               | -3.9         | 2.83E-09   |
| ENSMUSG00000086549 | Gm13648            | -2.7         | 1.67E-08   |
| ENSMUSG00000072618 | Gm10384            | 2.6          | 3.36E-08   |
| ENSMUSG00000006403 | Adamts4            | -1.7         | 9.58E-08   |
| ENSMUSG00000009907 | Vps4b              | 1.1          | 1.57E-07   |
| ENSMUSG00000021798 | Ldb3               | -1.9         | 6.84E-07   |
| ENSMUSG00000035934 | Pknox2             | -1.0         | 4.85E-06   |
| ENSMUSG00000022176 | Rem2               | 2.5          | 6.28E-06   |
| ENSMUSG00000028972 | Car6               | 3.2          | 6.28E-06   |
| ENSMUSG00000030854 | Ptpn5              | -6.0         | 6.84E-06   |
| ENSMUSG00000028386 | Slc46a2            | -3.7         | 6.94E-06   |
| ENSMUSG00000079620 | Muc4               | 1.8          | 7.80E-06   |
| ENSMUSG00000026321 | Tnfrsf11a          | 1.6          | 1.85E-05   |
| ENSMUSG00000028351 | Brinp1             | -2.7         | 2.07E-05   |
| ENSMUSG00000015484 | Fam163a            | -4.8         | 2.40E-05   |
| ENSMUSG00000034730 | Adgrb1             | -2.2         | 2.40E-05   |
| ENSMUSG00000050473 | Slc35d3            | 3.8          | 2.66E-05   |
| ENSMUSG00000029304 | Spp1               | 2.4          | 3.30E-05   |
| ENSMUSG00000027446 | Cstdc2             | -2.9         | 4.30E-05   |
| ENSMUSG00000021356 | Irf4               | -2.2         | 4.30E-05   |
| ENSMUSG00000064010 | Dppa1              | 5.4          | 4.30E-05   |
| ENSMUSG00000027797 | Dclk1              | -1.0         | 4.41E-05   |
| ENSMUSG00000014725 | Adam28             | -2.6         | 1.38E-04   |
| ENSMUSG00000074715 | Ccl28              | -2.0         | 1.45E-04   |
| ENSMUSG00000068617 | Efcab1             | -1.7         | 1.76E-04   |
| ENSMUSG00000005917 | Otx1               | -2.7         | 1.94E-04   |
| ENSMUSG00000026319 | Relch              | 1.2          | 2.22E-04   |
| ENSMUSG00000027070 | Lrp2               | -2.9         | 2.38E-04   |
| ENSMUSG00000037820 | Tgm2               | -1.6         | 2.38E-04   |
| ENSMUSG00000041559 | Fmod               | 1.6          | 2.43E-04   |
| ENSMUSG00000042035 | Igsf3              | 1.0          | 2.63E-04   |
| ENSMUSG00000110218 | Gm20219            | 1.7          | 3.72E-04   |
| ENSMUSG00000040310 | Alx4               | -1.6         | 4.33E-04   |
| ENSMUSG00000049556 | Lingo1             | -1.4         | 5.51E-04   |
| ENSMUSG00000032091 | Tmprss4            | 1.7          | 6.16E-04   |
| ENSMUSG00000031432 | Prps1              | -1.1         | 6.74E-04   |
| ENSMUSG00000053399 | Adamts18           | -1.1         | 6.74E-04   |
| ENSMUSG00000010461 | Eya4               | -1.4         | 7.44E-04   |
| ENSMUSG00000065400 | Mir200a            | -6.1         | 8.08E-04   |
| ENSMUSG00000000381 | Wap                | 2.7          | 8.62E-04   |
| ENSMUSG00000045319 | Proser2            | 1.4          | 9.19E-04   |
| ENSMUSG00000022840 | Adcy5              | -1.4         | 9.33E-04   |

|                    |               |      |          |
|--------------------|---------------|------|----------|
| ENSMUSG00000042254 | Cilp          | 1.2  | 9.39E-04 |
| ENSMUSG00000090061 | Nwd2          | -3.2 | 9.66E-04 |
| ENSMUSG00000044340 | Phlpp1        | 1.3  | 1.19E-03 |
| ENSMUSG00000022696 | Sidt1         | 3.2  | 1.26E-03 |
| ENSMUSG00000038418 | Egr1          | 1.3  | 1.54E-03 |
| ENSMUSG00000099843 | Gm7160        | 1.1  | 1.59E-03 |
| ENSMUSG00000033268 | Duox1         | 2.5  | 1.67E-03 |
| ENSMUSG00000018907 | Alox12e       | -3.0 | 1.79E-03 |
| ENSMUSG00000051048 | P4ha3         | -2.4 | 1.82E-03 |
| ENSMUSG00000057329 | Bcl2          | 1.4  | 1.83E-03 |
| ENSMUSG00000111844 | Gm47097       | 2.4  | 1.85E-03 |
| ENSMUSG00000105954 | Gm42793       | 4.2  | 1.95E-03 |
| ENSMUSG00000039438 | Ttc36         | 1.5  | 2.20E-03 |
| ENSMUSG00000075707 | Dio3          | -5.9 | 2.23E-03 |
| ENSMUSG00000058498 | Rnf207        | 1.7  | 2.23E-03 |
| ENSMUSG00000018924 | Alox15        | -2.3 | 2.25E-03 |
| ENSMUSG00000055546 | Timd4         | -1.3 | 2.25E-03 |
| ENSMUSG00000021678 | F2rl1         | 1.3  | 2.80E-03 |
| ENSMUSG00000029436 | Mmp17         | -1.1 | 2.86E-03 |
| ENSMUSG00000030787 | Lyve1         | -1.9 | 3.04E-03 |
| ENSMUSG00000068196 | Col8a1        | 1.4  | 3.18E-03 |
| ENSMUSG00000020844 | Nxn           | -1.0 | 3.55E-03 |
| ENSMUSG00000097595 | 1500002F19Rik | 3.2  | 3.55E-03 |
| ENSMUSG00000092283 | Gm20412       | -1.8 | 3.67E-03 |
| ENSMUSG00000041674 | BC006965      | 1.8  | 3.67E-03 |
| ENSMUSG00000057003 | Myh4          | -1.5 | 3.87E-03 |
| ENSMUSG00000089804 | Gm16136       | 1.2  | 4.25E-03 |
| ENSMUSG00000026304 | Rab17         | 1.4  | 4.54E-03 |
| ENSMUSG00000030413 | Pglyrp1       | 1.2  | 4.57E-03 |
| ENSMUSG00000059898 | Dsc3          | -1.6 | 4.66E-03 |
| ENSMUSG00000022491 | Glycam1       | 8.7  | 5.08E-03 |
| ENSMUSG00000044667 | Plppr4        | 1.5  | 5.80E-03 |
| ENSMUSG00000054598 | 9130230L23Rik | 2.0  | 6.68E-03 |
| ENSMUSG00000078763 | Slfn1         | -2.4 | 7.06E-03 |
| ENSMUSG00000104839 | Gm42794       | -2.8 | 7.20E-03 |
| ENSMUSG00000037379 | Spon2         | -1.6 | 7.20E-03 |
| ENSMUSG00000074923 | Pak6          | 1.5  | 7.20E-03 |
| ENSMUSG00000040093 | Bmf           | 1.2  | 7.33E-03 |
| ENSMUSG00000052105 | Mtcl1         | -1.0 | 7.46E-03 |
| ENSMUSG00000029245 | Epha5         | -3.9 | 8.48E-03 |
| ENSMUSG00000028943 | Espn          | 1.2  | 8.48E-03 |
| ENSMUSG00000114104 | Gm47585       | 4.5  | 8.48E-03 |
| ENSMUSG00000051727 | Kctd14        | 1.6  | 8.90E-03 |
| ENSMUSG00000049092 | Gpr137c       | 1.6  | 8.90E-03 |
| ENSMUSG00000028836 | Slc30a2       | 2.1  | 8.90E-03 |
| ENSMUSG00000054459 | Vsnl1         | -1.3 | 9.20E-03 |
| ENSMUSG00000042268 | Slc26a9       | 2.0  | 9.31E-03 |

|                    |        |      |          |
|--------------------|--------|------|----------|
| ENSMUSG00000108106 | Gm5886 | -2.0 | 9.56E-03 |
| ENSMUSG00000037922 | Bank1  | -1.3 | 9.56E-03 |

ary Glands
